# Supplementary material for: Inkjet-printed flexible graphene paper electrode for the electrochemical determination of mercury
Source: Royal Society of Chemistry journal article supplement (doi:10.1039/d3ra02757k), 2023-01-01
Supplement: d3ra02757k1.pdf [file d3ra02757k1.pdf]

# **Inkjet-printed flexible graphene paper electrode for electrochemical determination of mercury**

**Tushar Kant<sup>1</sup>, Kamlesh Shrivastava<sup>1\*</sup>, Tikeswari<sup>1</sup> and Vellaichamy Ganesan<sup>2</sup>**

<sup>1</sup>School of Studies in Chemistry, Pt. Ravishankar Shukla University, Raipur-492010 (C.G.),  
India

<sup>2</sup>Department of Chemistry, Institute of Science, Banaras Hindu University, Varanasi-221005,  
(UP), India

**\*Corresponding author: Email: [kshrivas@gmail.com](mailto:kshrivas@gmail.com)**

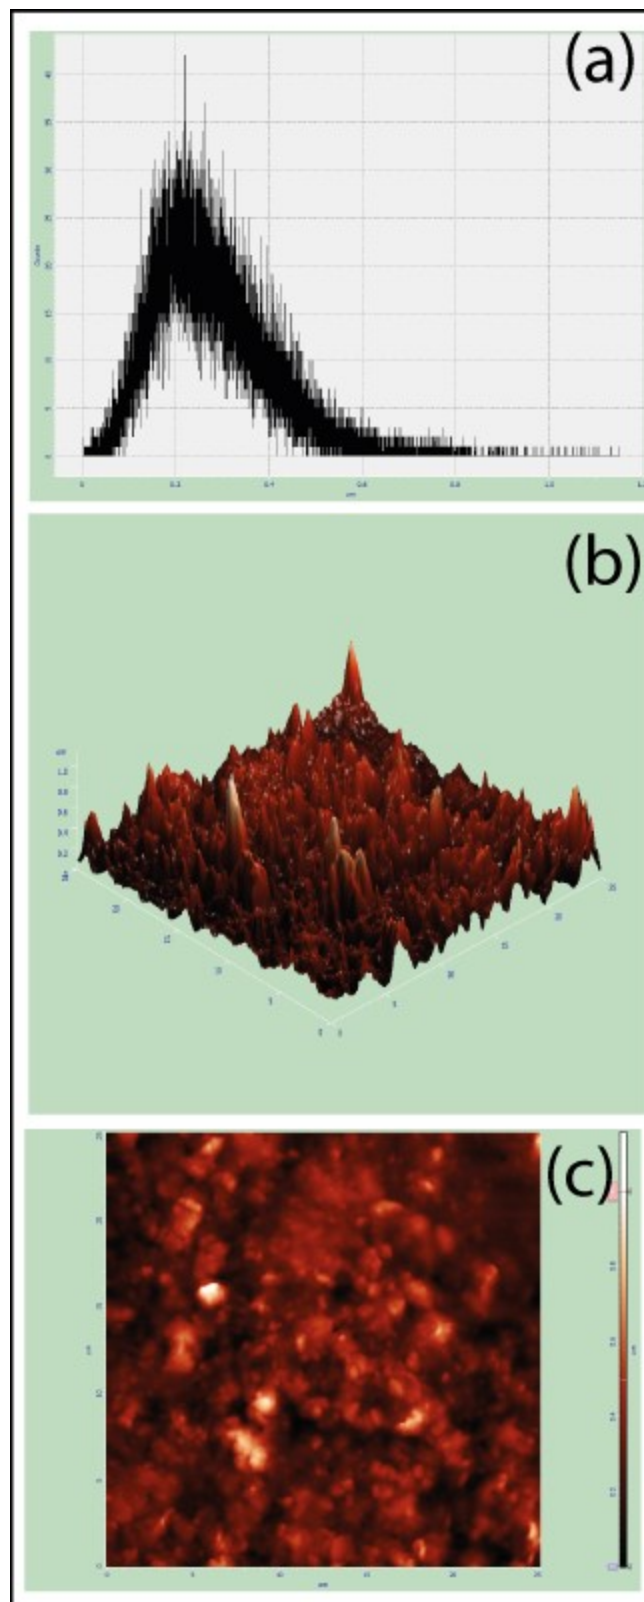

**Fig- S1.** AFM images of Gr-EC.

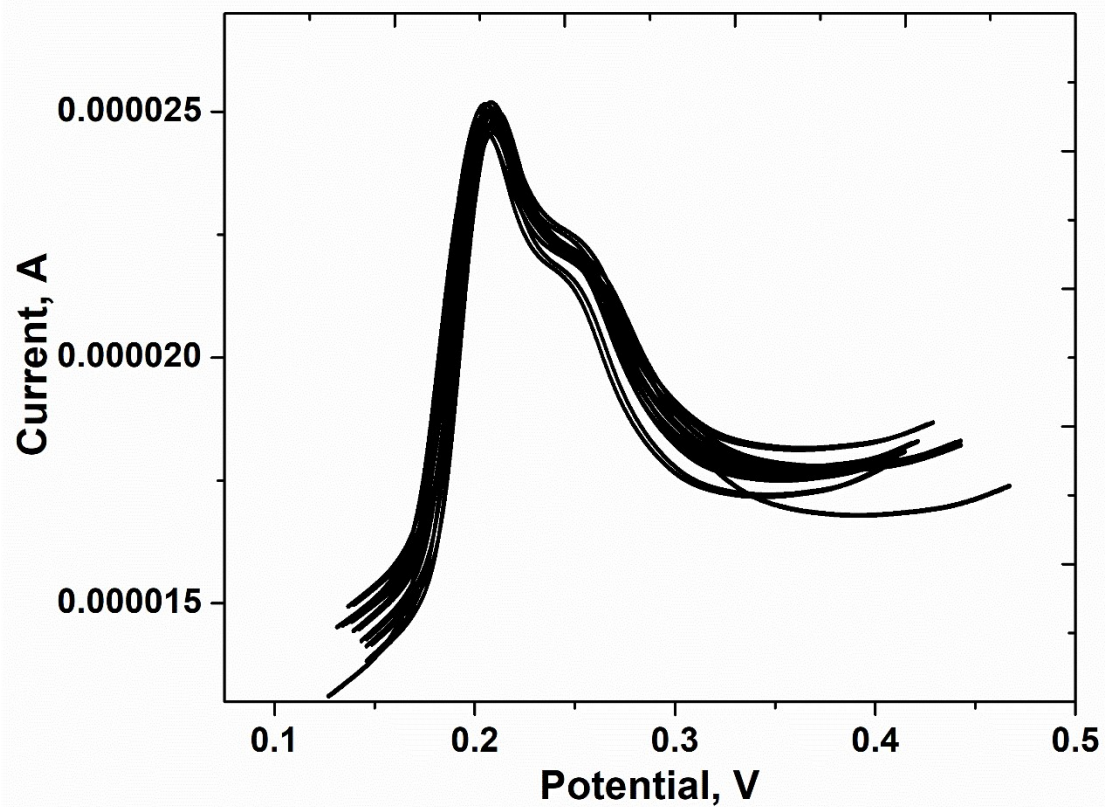

**Fig- S2.** 30 cycles LSV plots of 50  $\mu\text{M}$  Hg(II) concentrations using IP-GPE in 0.1 M PBS (pH 4.5) at a 100 mV/s sweep rate.

| <b>Table S1. AFM data</b>         |            |
|-----------------------------------|------------|
| Amount of sampling                | 65536      |
| Max                               | 1151.6 nm  |
| Min                               | 0 nm       |
| Peak-to-peak, $S_y$               | 1151.6 nm  |
| Ten-point height, $S_z$           | 563.784 nm |
| Average                           | 274.222 nm |
| Average Roughness, $S_a$          | 95.932 nm  |
| Root Mean Square, $S_q$           | 122.417 nm |
| Second moment                     | 90183.7    |
| Surface skewness, $S_{sk}$        | 0.948      |
| Coefficient of kurtosis, $S_{ka}$ | 1.8015     |
| Entropy                           | 12.213     |
| Redundance                        | -0.201     |

| <b>Table S2.</b> Determination of stability of Gr-EC/PPE when IP-GPE used as a working electrode for 30 days with 1 mM H <sub>g</sub> (II). |                         |                       |
|---------------------------------------------------------------------------------------------------------------------------------------------|-------------------------|-----------------------|
| Number of Days                                                                                                                              | Reduction Potential (V) | Reduction Current (A) |
| 1.                                                                                                                                          | 0.2289                  | 0.00003               |
| 2.                                                                                                                                          | 0.2287                  | 0.000029              |
| 3.                                                                                                                                          | 0.2285                  | 0.000032785           |
| 4.                                                                                                                                          | 0.22808                 | 0.000032929           |
| 5.                                                                                                                                          | 0.228                   | 0.000032749           |
| 6.                                                                                                                                          | 0.228                   | 0.000032965           |
| 7.                                                                                                                                          | 0.22792                 | 0.000033001           |
| 8.                                                                                                                                          | 0.22784                 | 0.000033037           |
| 9.                                                                                                                                          | 0.22776                 | 0.000033073           |
| 10.                                                                                                                                         | 0.22768                 | 0.000033109           |
| 11.                                                                                                                                         | 0.2276                  | 0.000033145           |
| 12.                                                                                                                                         | 0.22752                 | 0.000033181           |
| 13.                                                                                                                                         | 0.2275                  | 0.000032893           |
| 14.                                                                                                                                         | 0.22744                 | 0.000033217           |
| 15.                                                                                                                                         | 0.22736                 | 0.000033253           |
| 16.                                                                                                                                         | 0.22728                 | 0.000033289           |
| 17.                                                                                                                                         | 0.2272                  | 0.000033325           |
| 18.                                                                                                                                         | 0.22712                 | 0.000033361           |
| 19.                                                                                                                                         | 0.22704                 | 0.000033397           |
| 20.                                                                                                                                         | 0.22696                 | 0.000033433           |
| 21.                                                                                                                                         | 0.22688                 | 0.000033469           |
| 22.                                                                                                                                         | 0.2268                  | 0.000033505           |

|     |         |            |
|-----|---------|------------|
| 23. | 0.22672 | 3.3541E-05 |
| 24. | 0.22664 | 3.3577E-05 |
| 25. | 0.22656 | 3.3613E-05 |
| 26. | 0.22648 | 3.3649E-05 |
| 27. | 0.2264  | 3.3685E-05 |
| 28. | 0.22632 | 3.3721E-05 |
| 29. | 0.22624 | 3.3757E-05 |
| 30. | 0.22616 | 3.3793E-05 |

**Table S3.** Determination of RSD, % (precision) of reduction potential and reduction current when IP-GPE used as a working electrode for 30 times scanning with 50  $\mu\text{M}$  Hg (II).

| S. No. | Reduction Potential (V) | Reduction Current (A) |
|--------|-------------------------|-----------------------|
| 1.     | 0.228                   | 0.000032749           |
| 2.     | 0.2285                  | 0.000032785           |
| 3.     | 0.2289                  | 0.00003               |
| 4.     | 0.2287                  | 0.000029              |
| 5.     | 0.2275                  | 0.000032893           |
| 6.     | 0.22808                 | 0.000032929           |
| 7.     | 0.228                   | 0.000032965           |
| 8.     | 0.22792                 | 0.000033001           |
| 9.     | 0.22784                 | 0.000033037           |
| 10.    | 0.22776                 | 0.000033073           |
| 11.    | 0.22768                 | 0.000033109           |

|              |                    |                    |
|--------------|--------------------|--------------------|
| 12.          | 0.2276             | 0.000033145        |
| 13.          | 0.22752            | 0.000033181        |
| 14.          | 0.22744            | 0.000033217        |
| 15.          | 0.22736            | 0.000033253        |
| 16.          | 0.22728            | 0.000033289        |
| 17.          | 0.2272             | 0.000033325        |
| 18.          | 0.22712            | 0.000033361        |
| 19.          | 0.22704            | 0.000033397        |
| 20.          | 0.22696            | 0.000033433        |
| 21.          | 0.22688            | 0.000033469        |
| 22.          | 0.2268             | 0.000033505        |
| 23.          | 0.22672            | 3.3541E-05         |
| 24.          | 0.22664            | 3.3577E-05         |
| 25.          | 0.22656            | 3.3613E-05         |
| 26.          | 0.22648            | 3.3649E-05         |
| 27.          | 0.2264             | 3.3685E-05         |
| 28.          | 0.22632            | 3.3721E-05         |
| 29.          | 0.22624            | 3.3757E-05         |
| 30.          | 0.22616            | 3.3793E-05         |
|              |                    |                    |
| <b>SD</b>    | <b>0.000721295</b> | <b>9.99887E-07</b> |
| <b>Mean</b>  | <b>0.2273</b>      | <b>3.30484E-05</b> |
| <b>RSD %</b> | <b>± 0.32</b>      | <b>± 3.0255</b>    |

**Table S4.** Calculation of recovery % of Hg(II) in industrial wastewater sample when IP-GPE used as working electrode in optimized condition.

| <b>Amount of Hg(II) added<br/>(<math>\mu\text{M}</math>)</b> | <b>Amount of <math>\text{H}_2\text{O}_2</math> found<br/>(<math>\mu\text{M}</math>)</b> | <b>Recovery %</b> |
|--------------------------------------------------------------|-----------------------------------------------------------------------------------------|-------------------|
| 8                                                            | 7.6                                                                                     | 95.0              |
| 10                                                           | 9.4                                                                                     | 94.0              |
